# Supplementary material for: Mechanistic basis for microhomology identification and genome scarring by polymerase theta
Source: PubMed Central journal article supplement — Proc Natl Acad Sci U S A. 2020 Mar 31;117(15):8476–85. doi: 10.1073/pnas.1921791117 (PMC7165422; doi:10.1073/pnas.1921791117), 2020-03-31
Supplement: pnas.1921791117.sapp.pdf [file pnas.1921791117.sapp.pdf]

1

2 Supplementary Information for:

3 **Mechanistic Basis for Microhomology Identification and Genome Scarring by Polymerase**

4 **Theta**

5 Juan Carvajal-Garcia<sup>a</sup>, Jang-Eun Cho<sup>b</sup>, Pablo Carvajal-Garcia<sup>c</sup>, Wanjuan Feng<sup>b</sup>, Richard D.

6 Wood<sup>d</sup>, Jeff Sekelsky<sup>b,e</sup>, Gaorav P. Gupta<sup>b,f,g</sup>, Steven A. Roberts<sup>h</sup>, Dale A. Ramsden<sup>b,f,\*</sup>

7 \* To whom correspondence should be addressed, Dale A. Ramsden

8 Email: dale\_ramsden@med.unc.edu

9 **This PDF file includes:**

10       Supplementary text

11       Figures S1 to S4

12       Tables S1 to S6

13       SI References

14

15 **Supplementary materials and methods**

16 **Materials**

17 Cells were incubated at 37 °C, 5% CO<sub>2</sub> and cultured in DMEM (Gibco) with 10% Fetal Bovine  
18 Serum (VWR Life Science Seradigm) and Penicillin (5 U/ml, Sigma). These lines and variants  
19 described below were confirmed to be free of mycoplasma contamination by a qPCR (1) with a  
20 detection limit below 10 genomes/1ml. Cell lines were additionally selected at random for third party  
21 validation of PCR results using Hoechst staining (2).

22

## 1 **Methods**

### 2 **Extrachromosomal Substrate generation**

3 A core fragment generated by PCR (primers in table S3) was digested with BsaI, and  
4 extrachromosomal substrate assembled by ligation of this BsaI digested core fragment with a 5-  
5 fold excess of head and tail caps generated by annealing oligos described in table S2 with T7 ligase  
6 (NEB). Excess cap was removed using QIAquick PCR Purification Kit (QIAGEN), and efficient  
7 substrate assembly and removal of excess cap confirmed by analytical gel electrophoresis.

### 8 **High throughput sequencing junction characterization**

9 The total number of sequence reads for each biological replicate is reported in supplemental Table  
10 S6. Junctions were characterized by independently identifying within each read the least-deleted  
11 10 nucleotide match to sequence upstream of the break site, then the least-deleted 10 nucleotide  
12 match to sequence downstream of the break site. When present, microhomologies were defined  
13 as the overlap between upstream and downstream matches, and insertions were defined as non-  
14 matching sequences separating upstream and downstream matches. Further analysis of junctions  
15 employed a “reconstructed junction”, consisting of a concatenation of the 10 bp upstream flank  
16 match (including microhomology, when present), inserted sequence (when present), and the 10 bp  
17 downstream flank (excluding microhomology, when present). We report in supplemental datasets  
18 S1-S5 the frequencies of these reconstructed junctions for each of the 3 biological replicates  
19 for complemented *Polq*<sup>-/-</sup> cells (“PlusPOLQ”) as well as the parental line (“MinusPOLQ”) for all 5  
20 break sites (R26A-E). The location of microhomologies is defined as the distance relative to the  
21 break point after excluding microhomologous sequence in these supplemental tables (columns  
22 titled upstream and downstream deletion), as well as in results and discussion. Additional tables  
23 that describe the further analysis of these junctions can be provided upon request.

24 For Figs. 3 and 4, insertions were characterized as templated direct repeats if the first 5 nucleotides  
25 of the inserted sequence could be mapped to sequence within 50 nt downstream of the break site  
26 (“downstream direct repeats”) or the last 5 nucleotides of the inserted sequence could be mapped  
27 to sequence 50 nt upstream of the break site (“upstream direct repeats”). Insertions were  
28 characterized as templated inverse repeats if the 5 last nucleotides of the inserted sequence could

1 be mapped to the reverse complement of sequence within 50 nt downstream of the break  
2 (“downstream inverse repeats”) or if the 5 first nt of the inserted sequence could be mapped to the  
3 reverse complement of the 50 nt upstream of the break (“upstream inverse repeats”). We included  
4 cases of insertions < 5 nt as templated if additional templated insertions could be inferred due to  
5 involvement of 2° microhomologies in resolution (i.e. when sequence downstream of the insertion  
6 extended the identity that was detected in the proposed template to a total of 5 nt or more). When  
7 multiple flanking sequences with 5 nt or more of identity to the insert were identified, we selected  
8 as template the flanking sequence with the largest match. We excluded insertions where the first  
9 inserted nucleotide was substituted, relative to the reference, but subsequent inserted sequence  
10 was identical to reference; such products could be identified in control experiments as substitutions  
11 made during sample amplification.

12 Direct repeat 1° microhomologies in TINS with template in downstream DNA were determined by  
13 assessing the extent of identity between nucleotides in flanking DNA upstream of the insert when  
14 compared to nucleotides upstream of the identified template. Conversely, direct repeat 1°  
15 microhomologies in TINS with template in upstream DNA were determined by assessing the extent  
16 of identity between nucleotides in flanking DNA downstream of the insert when compared to  
17 nucleotides downstream of the identified template. 2° microhomologies were assessed similarly,  
18 except we assessed the extent of identity when comparing sequences on the opposite sides of the  
19 insert and identified template. As noted in the legend to Fig. 4F, we assessed 2° microhomologies  
20 only for TINS less than 5 nucleotides, to exclude significant contribution of TINS where there was  
21 more than one round of synthesis. (e.g. Fig. S3B).

22 For Fig. 6 and S5, mutations from 569 whole genome sequenced breast cancers were obtained  
23 from the International Cancer Genome Consortium (ICGC) data portal  
24 ([https://dcc.icgc.org/api/v1/download?fn=/release\\_26/Projects/BRCA-](https://dcc.icgc.org/api/v1/download?fn=/release_26/Projects/BRCA-EU/simple_somatic_mutation.open.BRCA-EU.tsv.gz)  
25 [EU/simple\\_somatic\\_mutation.open.BRCA-EU.tsv.gz](https://dcc.icgc.org/api/v1/download?fn=/release_26/Projects/BRCA-EU/simple_somatic_mutation.open.BRCA-EU.tsv.gz)). Mutation lists were sorted by sample,  
26 chromosome and position prior to removing duplicate mutation entries. All insertion mutations and  
27 multiple nucleotide variants (MNV, which involve deletion of a sequence and insertion of a new,  
28 non-reference sequence) were extracted. For MNVs, the inserted sequences were compared to

1 the deleted reference sequences to confirm accurate determination of the position the MNV event.  
2 For a small portion of MNVs, several nucleotides at either the 5' or 3' portions of the inserted  
3 sequences matched the sequence of the reference. These matching sequences were removed  
4 from the insertion sequence and the position of the MNV corrected prior to subsequent analysis.  
5 100 nt of DNA sequence flanking each mutation was retrieved from the hg19 reference sequence  
6 for the human genome. Templated insertions (TINS) events among the breast cancer mutations  
7 were defined as above, except we considered only 30 nt of flanking DNA sequence as possible  
8 template. We also excluded templated insertions in which the inserted sequence immediately  
9 followed the template (tandem repeats). Breast cancer mutations were additionally stratified by  
10 *BRCA1* and/or *BRCA2* deficiency as determined by a germline mutation or hyper methylation in  
11 either gene as reported (3). Original data files describing the *BRCA1/2* status of ICGC  
12 characterized tumors can be found at <https://github.com/wenweixiong/BRCA2018>. We obtained  
13 gene expression data for the evaluated tumors as log(2) transformed fragments per kilobase per  
14 million reads (FPKM) RNA-seq from Supplementary Table 7 of (4). We normalized *POLQ* log(2)  
15 FPKM counts according to housekeeping gene expression data as follows: for each of three  
16 housekeeping genes (*TBP*, *HPRT*, and *GAPDH*), we determined the difference between the log(2)  
17 FPKM counts for each tumor from the mean counts for the whole set, then averaged these three  
18 numbers for each tumor to determine normalization factors, which were then subtracted from the  
19 *POLQ* log(2) FPKM counts for each tumor.

Figure S1

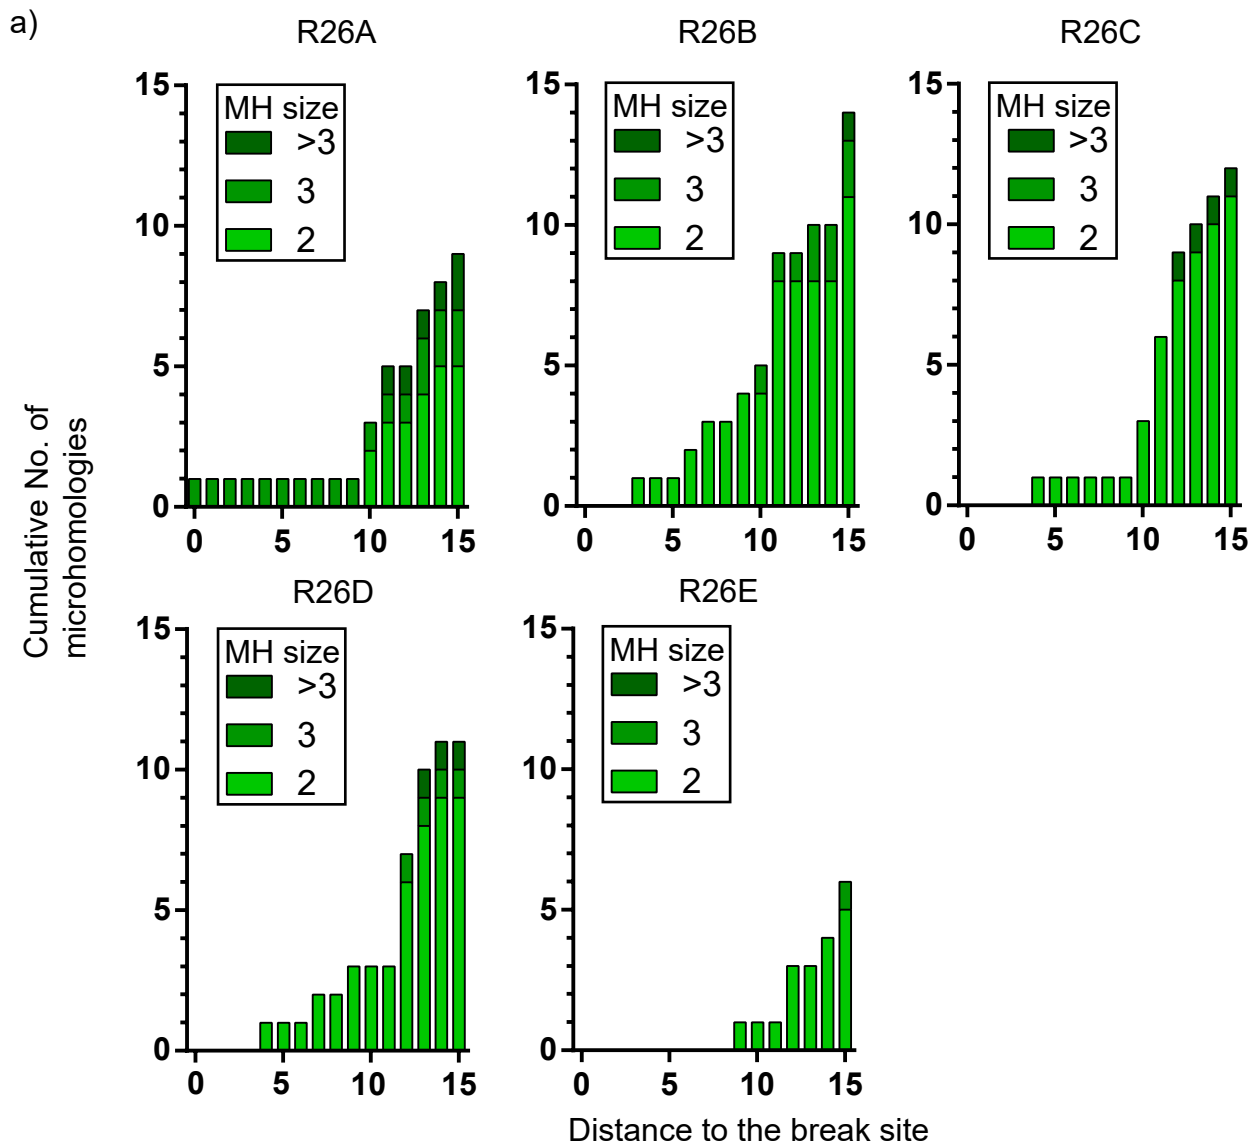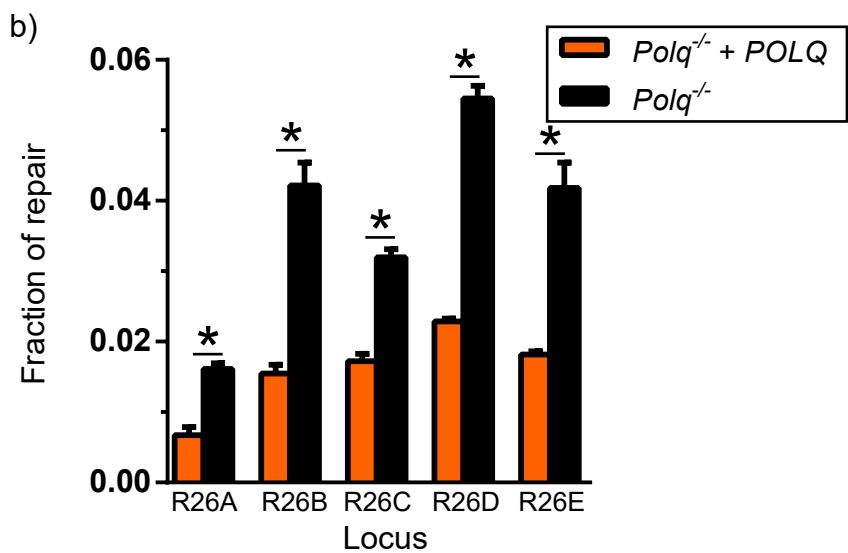

**Fig. S1.** A) Cumulative number of microhomologies larger than 1 bp at the noted distance to the break site. Distance to the break site corresponds to the largest of the two distances (upstream and downstream) from the beginning of the microhomology to the break terminus. B) Fraction of repair corresponding to deletions with microhomologies 2 bp or more and located more than 15 nt from both sides of the break site in *Polq*<sup>-/-</sup> cells that expressed POLQ (orange) or not (black). Bar represents the means and error bars SEM for 3 biological replicates. Statistical significance was assessed by one-way ANOVA with Bonferroni correction to account for multiple comparisons; \*,  $p < 0.05$ .

Figure S2

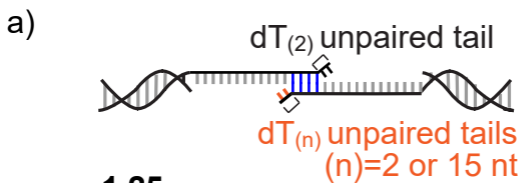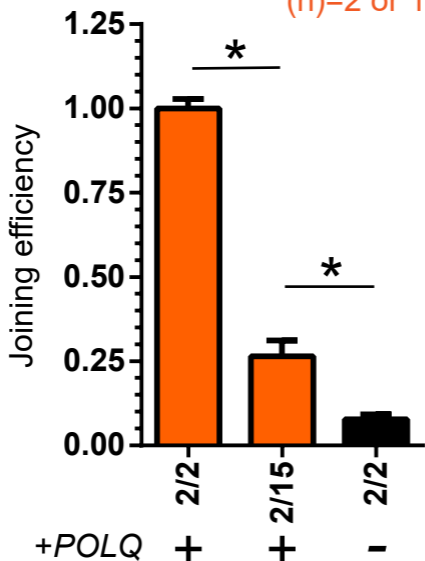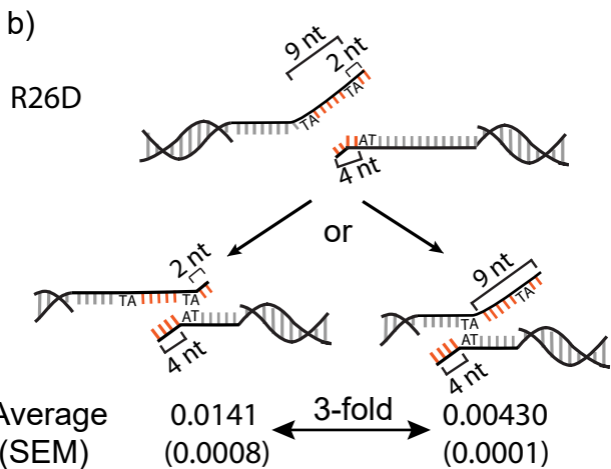

**Fig. S2.** A) Joining efficiency was calculated as in Fig. 2 for a substrate with a microhomology located 2 nt away from the 3' terminus for both head and tails ends (2/2), as well as a substrate with a microhomology 2 nt from the head 3' terminus and 15 nt from the tail 3' terminus (2/15). Bars represent the mean and error bars SEM for 3 biological replicates. Statistical significance was assessed by one-way ANOVA with Bonferroni correction to account for multiple comparisons B) Schematic of two Pol  $\theta$  dependent MHD identified in chromosomal repair products at the break site R26D. The fraction of repair products enriched by *POLQ* expression was calculated as in Fig 1. SEM is shown in parenthesis for 3 biological replicates.



Figure S3

a)

|                                                                                               | Location | MHD     | TINS (#)                      | Ratio |
|-----------------------------------------------------------------------------------------------|----------|---------|-------------------------------|-------|
|  <p>R26A</p> | 6/11     | 0.0234  | 9.21x10 <sup>-5</sup><br>(3)  | 254   |
|  <p>R26B</p> | 4/10     | 0.0323  | 4.29x10 <sup>-4</sup><br>(24) | 75.3  |
|  <p>R26E</p> | 9/0      | 0.00129 | 7.77x10 <sup>-4</sup><br>(12) | 1.66  |

b)

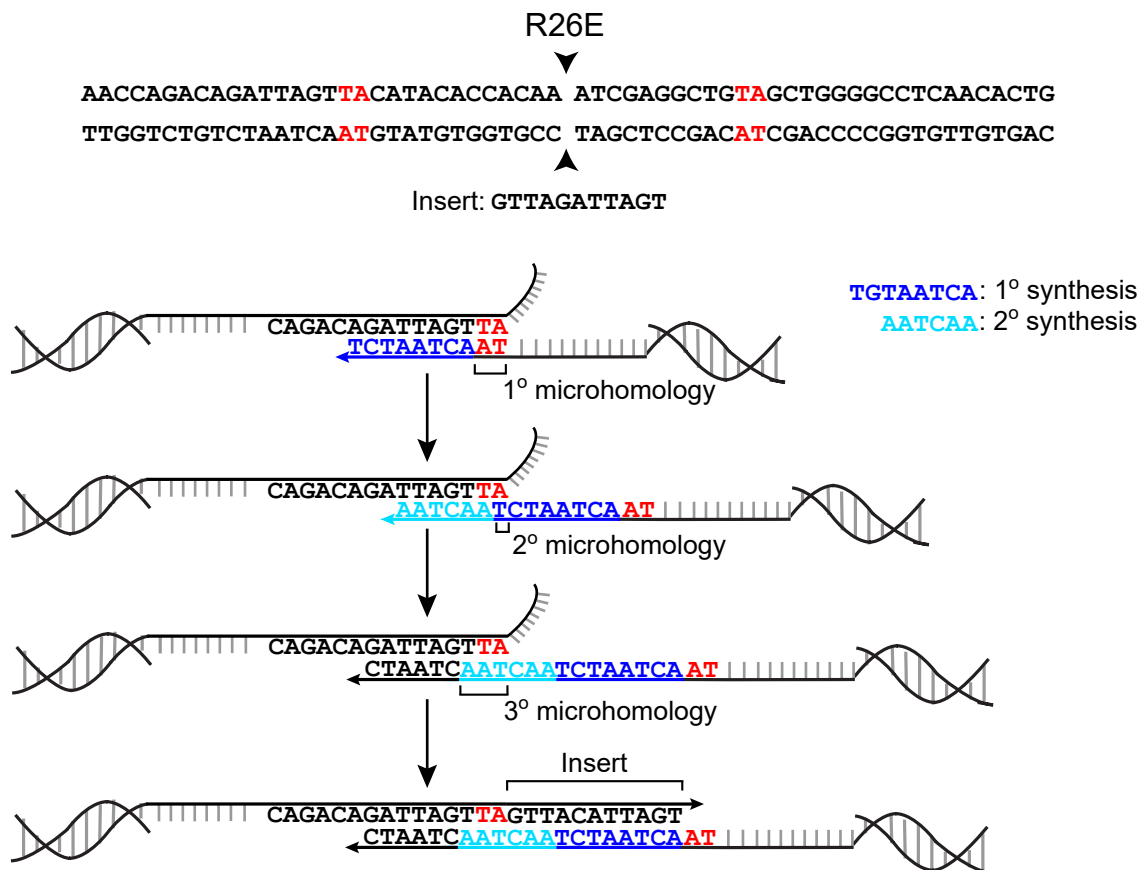

**Fig. S3.** A) The fraction of repair products enriched by *POLQ* expression comparing MHD vs. TINS and number of different TINS identified (#) for each of three 1° microhomologies of differing length; a 6 bp AGTCTT microhomology in R26A, a 3 bp TCC microhomology in R26B, and a 2 bp AT microhomology in R26E). The location of the 1° microhomology with respect to the break site is indicated as upstream deletion/downstream deletions). B) Generation of a repair product consistent with three microhomology primed synthesis events. Primary (1°) microhomology is shown in red, 1° round of synthesis in dark blue, and secondary (2°) round of synthesis in cyan.

Figure S4

a)

R26A AGTCTTTCTAGA AGATGGGCGGGA

↓  
AGTCTTTCTAGA---TGGGCGGGA

3 bp MHD

wt → 17%

*Polq*<sup>-/-</sup> → 11%

*Ku70*<sup>-/-</sup> → 1.5%

c)

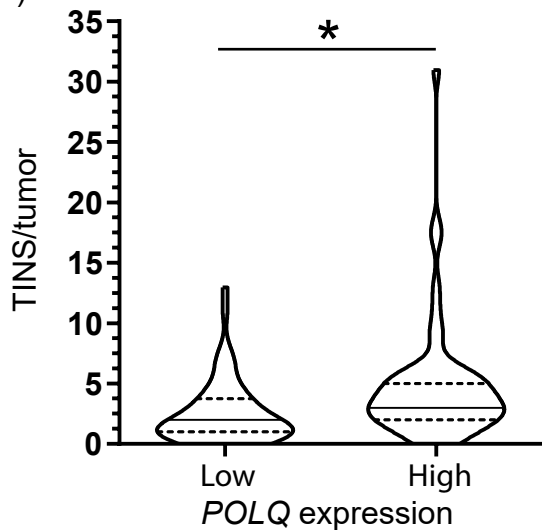

e)

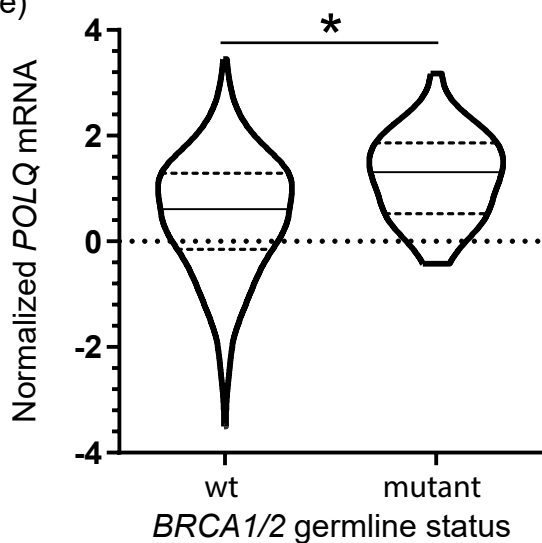

b)

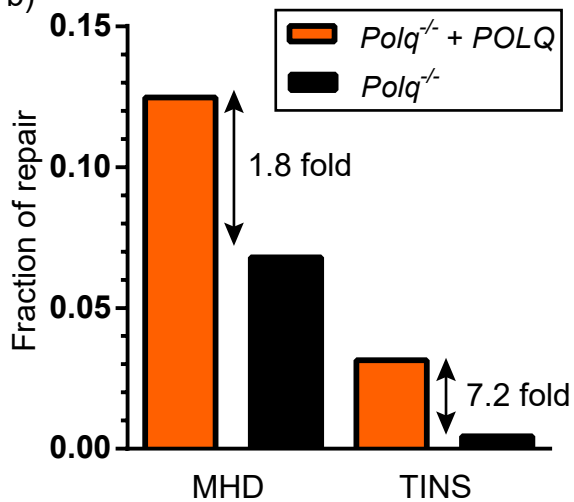

d)

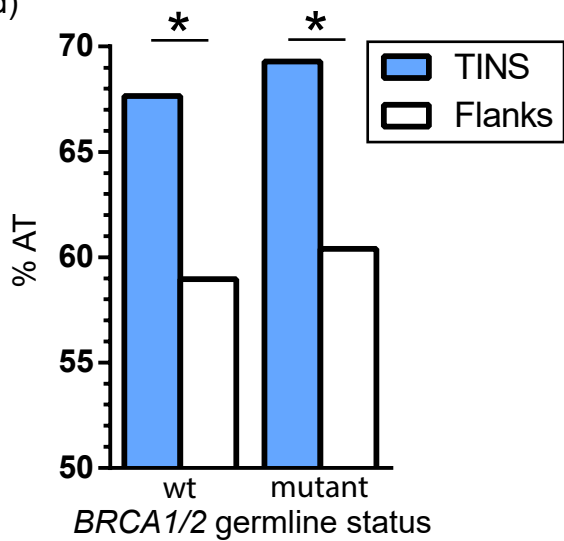

**Fig. S4.** A) Structure of a repair event in R26A characterized as deletion of a terminal 3 bp microhomology (in orange), with the fraction of repair represented by this product noted for wild type, *Polq*<sup>-/-</sup> and *Ku70*<sup>-/-</sup> cells. Data for *Ku70*<sup>-/-</sup> was obtained from (5). B) Fraction of repair corresponding to MHD and TINS averaged across the 5 break sites tested in cells expressing *POLQ* (orange) or not (black). The fold difference is shown and was calculated as the fraction in *POLQ* expressing cells divided by the fraction in parental *Polq*<sup>-/-</sup> cells. C) The frequency of TINS/tumor genome was determined for tumors with high or low levels of *POLQ* expression determined as in Fig. 6A, except tumors with germline *BRCA* mutations were excluded. D) Average percent AT content in TINS found in tumor genomes defined as in Fig. 6 (blue), compared to the average AT content in the 100 bp surrounding the insert (Flanks, white). Statistical significance was assessed by a two-tailed t-test; \*, p<0.05. E) Levels of *POLQ* mRNA were normalized as in Fig. 6A, and compared in tumors with wild type (wt) germline *BRCA* genes vs. tumors with germline mutations in *BRCA* genes. Statistical significance was assessed with a two-tailed Mann-Whitney test, \*p<0.05.

**Table S1:** Pol  $\theta$  dependent repair events

| Locus | Upstream deletion | Downstream deletion | Microhomology size | Fraction enriched by POLQ |
|-------|-------------------|---------------------|--------------------|---------------------------|
| R26A  | 0                 | 0                   | 3                  | 0.057557                  |
|       | 6                 | 11                  | 6                  | 0.023439                  |
|       | 10                | 0                   | 2                  | 0.006968                  |
|       | 3                 | 5                   | 0                  | 0.000259                  |
| R26B  | 4                 | 10                  | 3                  | 0.032344                  |
|       | 3                 | 0                   | 2                  | 0.017555                  |
|       | 1                 | 11                  | 2                  | 0.008442                  |
|       | 6                 | 6                   | 2                  | 0.006746                  |
|       | 3                 | 4                   | 1                  | 0.004777                  |
|       | 7                 | 2                   | 2                  | 0.004391                  |
|       | 8                 | 4                   | 1                  | 0.00411                   |
|       | 6                 | 9                   | 1                  | 0.003844                  |
| R26C  | 2                 | 4                   | 2                  | 0.036814                  |
|       | 9                 | 9                   | 0                  | 0.000588                  |
|       | 11                | 6                   | 0                  | 0.00058                   |
|       | 3                 | 7                   | 0                  | 0.000381                  |
|       | 15                | 3                   | 0                  | 0.000305                  |
| R26D  | 4                 | 7                   | 2                  | 0.021654                  |
|       | 2                 | 4                   | 2                  | 0.014109                  |
|       | 1                 | 4                   | 1                  | 0.008736                  |
|       | 2                 | 1                   | 0                  | 0.006699                  |
|       | 0                 | 1                   | 0                  | 0.005915                  |
|       | 2                 | 1                   | 1                  | 0.004951                  |
|       | 9                 | 4                   | 2                  | 0.004299                  |
|       | 4                 | 0                   | 1                  | 0.004095                  |
|       | 8                 | 4                   | 1                  | 0.002299                  |
|       | 1                 | 1                   | 0                  | 0.0018                    |
|       | 9                 | 1                   | 0                  | 0.001155                  |
| 2     | 41                | 3                   | 9.37E-05           |                           |
| R26E  | 6                 | 6                   | 0                  | 0.00366                   |

Upstream and downstream deletion, microhomology size, and fraction of repair enriched by POLQ expression for all the repair events significantly enriched in cells expressing wt POLQ vs. Polq<sup>-/-</sup> in triplicate experiments. Statistical significance was identified using a two tailed t-test and the Benjamini-Hochberg procedure to adjust p values for multiple comparisons, with a false discovery rate of 0.05.

**Table S2.** Substrate preparation oligonucleotides

| Substrate           | Side | Sequence                                                                                                  |
|---------------------|------|-----------------------------------------------------------------------------------------------------------|
| All (bottom strand) | Head | CATCGCTTAGCTGTATA                                                                                         |
|                     | Tail | CTCACACCCATCTCA                                                                                           |
| 2/2                 | Head | 5'/phos/TGACTATACAGCTAAGCGATGCTCTCACCGAGCGTATCTGCTGGGTT<br>GTGGATGAATTACATATGCTGGGAGAACCAAGATTGGGCAGTT    |
|                     | Tail | 5'/phos/AGTCTGAGATGGGTGTGAGAGTGAAGATCCTCACCTTCGGAGTACTC<br>CTTCTTTTGACCATTGATACGATACTTCTCAGCCGAGCTGCTT    |
| 10/10               | Head | 5'/phos/TGACTATACAGCTAAGCGATGCTCTCACCGAGCGTATCTGCTGGGTT<br>GTGGATGAATTACATATGCTGGGAGAACCGCAGTTTTTTTTTTTT  |
|                     | Tail | 5'/phos/AGTCTGAGATGGGTGTGAGAGTGAAGATCCTCACCTTCGGAGTACTC<br>CTTCTTTTGACCATTGATACGATACTTCTCTGCTTTTTTTTTTTTT |
| 15/15 (4)           | Head | 5'/phos/TGACTATACAGCTAAGCGATGCTCTCACCGAGCGTATCTGCTGGGTT<br>GTGGATGAATTACATATGCTGGGCGCAGTTTTTTTTTTTTTTTT   |
|                     | Tail | 5'/phos/AGTCTGAGATGGGTGTGAGAGTGAAGATCCTCACCTTCGGAGTACTC<br>CTTCTTTTGACCATTGATACGATCCTGCTTTTTTTTTTTTTTTTT  |
| 14/14 (6)           | Head | 5'/phos/TGACTATACAGCTAAGCGATGCTCTCACCGAGCGTATCTGCTGGGTT<br>GTGGATGAATTACATATGCTGGGAGCAGTTTTTTTTTTTTTTTT   |
|                     | Tail | 5'/phos/AGTCTGAGATGGGTGTGAGAGTGAAGATCCTCACCTTCGGAGTACTC<br>CTTCTTTTGACCATTGATACGATACTGCTTTTTTTTTTTTTTTTT  |
| 30/30               | Head | 5'/phos/TGACTATACAGCTAAGCGATGCTCTCACCGAGCGTATCTGCTGGGTT<br>GTGGATGAGCAGTTTTTTTTTTTTTTTTTTTTTTTTTTTTTTTT   |
|                     | Tail | 5'/phos/AGTCTGAGATGGGTGTGAGAGTGAAGATCCTCACCTTCGGAGTACTC<br>CTTCTTTACTGCTTTTTTTTTTTTTTTTTTTTTTTTTTTTTTTTT  |
| 2/15                | Head | 5'/phos/TGACTATACAGCTAAGCGATGCTCTCACCGAGCGTATCTGCTGGGTT<br>GTGGATGAATTACATATGCTGGGAGAACCAAGATTGGGCAGTT    |
|                     | Tail | 5'/phos/AGTCTGAGATGGGTGTGAGAGTGAAGATCCTCACCTTCGGAGTACTC<br>CTTCTTTTGACCATTGATACGATCCTGCTTTTTTTTTTTTTTTTT  |
| 2+10/<br>2+10       | Head | 5'/phos/TGACTATACAGCTAAGCGATGCTCTCACCGAGCGTATCTGCTGGGTT<br>GTGGATGAATTACATATGCTATCCACGACGCAGTACGGCAGTT    |
|                     | Tail | 5'/phos/AGTCTGAGATGGGTGTGAGAGTGAAGATCCTCACCTTCGGAGTACTC<br>CTTCTTTTGACCATTGATACGAGGTCACCCTGCTTGGCTGCTT    |
| 3bp-AT              | Head | 5'/phos/TGACTATACAGCTAAGCGATGCTCTCACCGAGCGTATCTGCTGGGTT<br>GTGGATGAATTACATATCATGTAAGAACATTATTTTCATTAGTT   |
|                     | Tail | 5'/phos/AGTCTGAGATGGGTGTGAGAGTGAAGATCCTCACCTTCGGAGTACTC<br>CTTCTTTTGACCATTGATTAGTATAGTTATTCATTCATCTATT    |
| 3bp-GC              | Head | 5'/phos/TGACTATACAGCTAAGCGATGCTCTCACCGAGCGTATCTGCTGGGTT<br>GTGGATGAATTACATATGCTGGGACGCGACGACGCGTAGTT      |
|                     | Tail | 5'/phos/AGTCTGAGATGGGTGTGAGAGTGAAGATCCTCACCTTCGGAGTACTC<br>CTTCTTTTGACCATTGATGCGCGGACCAGGCGGAGTGGCTATT    |
| 6bp-AT              | Head | 5'/phos/TGACTATACAGCTAAGCGATGCTCTCACCGAGCGTATCTGCTGGGTT<br>GTGGATGAATTACATATCATGTAAGAACATTATTTTAGATGTT    |
|                     | Tail | 5'/phos/AGTCTGAGATGGGTGTGAGAGTGAAGATCCTCACCTTCGGAGTACTC<br>CTTCTTTTGACCATTGATTAGTATAGTTATTCATTCATCTATT    |

Top and bottom strands of the caps (head and tail) used to make extrachromosomal substrates (bottom is common to all substrates, preferentially used microhomology in top strands underlined). All oligos were PAGE purified (IDT).

**Table S3.** PCR primer sequences

| <b>PCR</b>                   | <b>Primer</b> | <b>Sequence</b>                  |
|------------------------------|---------------|----------------------------------|
| Substrate core PCR           | Fwd           | CAAGTGGTCTCAGACTGGCTACCCTGCT     |
|                              | Rev           | GCCGAGGTCTCCGTCAGGGAAATCAAACGTAA |
| Substrate quantification PCR | Fwd           | TAAGCGATGCTCTCACCGAG             |
|                              | Rev           | GATGGGTGTGAGAGTGAAGATC           |

Forward and reverse primers used to amplify the substrate core and to quantify and characterize substrate repair products

**Table S4.** Break site sequences

| <b>Locus</b> | <b>gRNA sequence + PAM</b>       | <b>Chr. 6 location</b> |
|--------------|----------------------------------|------------------------|
| R26A         | ACTCCAGTCTTTCTAGAAGAT <u>G</u> G | 113,068,731            |
| R26B         | CCGCCTCGGAGTATTTTCCATCG          | 113,068,958            |
| R26C         | CATGGATTTCTCCGGTGAATAGG          | 113,071,870            |
| R26D         | CCTATTCACGTAACCAGGTTAGC          | 113,075,531            |
| R26E         | CCACAAATCGAGGCTGTAGCTGG          | 113,069,295            |

gRNA sequences + PAM (underlined) and sequence location in the mouse chromosome 6 for all 5 break sites tested.



**Table S5.** Sequencing library preparation primers

| PCR                                      | Sample                                   | Primer                                   | SEQUENCE                                                       |                                                             |
|------------------------------------------|------------------------------------------|------------------------------------------|----------------------------------------------------------------|-------------------------------------------------------------|
| R26A                                     | <i>Polq</i> <sup>-/-</sup> +<br>POLQ (1) | Fwd                                      | CTACACGACGCTCTTCCGATCTCGATGTCGAAGTTCTCT<br>GCTGCCTCCTGGCTTCT   |                                                             |
|                                          |                                          | Rev                                      | GCTGAACCGCTCTTCCGATCTCAGATCTTCTGTGGGAAG<br>TCTTGTCCCTCCAA      |                                                             |
|                                          | <i>Polq</i> <sup>-/-</sup> +<br>POLQ (2) | Fwd                                      | CTACACGACGCTCTTCCGATCTATCACGATGAAGTTCTC<br>TGCTGCCTCCTGGCTTCT  |                                                             |
|                                          |                                          | Rev                                      | GCTGAACCGCTCTTCCGATCTCAGATCTTCTGTGGGAAG<br>TCTTGTCCCTCCAA      |                                                             |
|                                          | <i>Polq</i> <sup>-/-</sup> +<br>POLQ (3) | Fwd                                      | CTACACGACGCTCTTCCGATCTTTAGGCTGCGAAGTTCT<br>CTGCTGCCTCCTGGCTTCT |                                                             |
|                                          |                                          | Rev                                      | GCTGAACCGCTCTTCCGATCTCAGATCTTCTGTGGGAAG<br>TCTTGTCCCTCCAA      |                                                             |
|                                          | <i>Polq</i> <sup>-/-</sup> (1)           | Fwd                                      | CTACACGACGCTCTTCCGATCTCGATGTCGAAGTTCTCT<br>GCTGCCTCCTGGCTTCT   |                                                             |
|                                          |                                          | Rev                                      | GCTGAACCGCTCTTCCGATCTTGACCAGTTCTGTGGGAA<br>GTCTTGTCCCTCCAA     |                                                             |
|                                          | <i>Polq</i> <sup>-/-</sup> (2)           | Fwd                                      | CTACACGACGCTCTTCCGATCTATCACGATGAAGTTCTC<br>TGCTGCCTCCTGGCTTCT  |                                                             |
|                                          |                                          | Rev                                      | GCTGAACCGCTCTTCCGATCTTGACCAGTTCTGTGGGAA<br>GTCTTGTCCCTCCAA     |                                                             |
|                                          | <i>Polq</i> <sup>-/-</sup> (3)           | Fwd                                      | CTACACGACGCTCTTCCGATCTTTAGGCTGCGAAGTTCT<br>CTGCTGCCTCCTGGCTTCT |                                                             |
|                                          |                                          | Rev                                      | GCTGAACCGCTCTTCCGATCTTGACCAGTTCTGTGGGAA<br>GTCTTGTCCCTCCAA     |                                                             |
|                                          | R26B                                     | <i>Polq</i> <sup>-/-</sup> +<br>POLQ (1) | Fwd                                                            | CTACACGACGCTCTTCCGATCTACAGTGGAGTGCAATTG<br>GAGGGACAAGACTTCC |
|                                          |                                          |                                          | Rev                                                            | GCTGAACCGCTCTTCCGATCTGCCAATCCTGTGCAGGAT<br>CTCAAGCAGGAGAGTA |
| <i>Polq</i> <sup>-/-</sup> +<br>POLQ (2) |                                          | Fwd                                      | CTACACGACGCTCTTCCGATCTGCCAATCCTGTGCAATT<br>GGAGGGACAAGACTTCC   |                                                             |
|                                          |                                          | Rev                                      | GCTGAACCGCTCTTCCGATCTGCCAATCCTGTGCAGGAT<br>CTCAAGCAGGAGAGTA    |                                                             |
| <i>Polq</i> <sup>-/-</sup> +<br>POLQ (3) |                                          | Fwd                                      | CTACACGACGCTCTTCCGATCTTAGCTTAACACAATAATT<br>GGAGGGACAAGACTTCC  |                                                             |
|                                          |                                          | Rev                                      | GCTGAACCGCTCTTCCGATCTGCCAATCCTGTGCAGGAT<br>CTCAAGCAGGAGAGTA    |                                                             |
| <i>Polq</i> <sup>-/-</sup> (1)           |                                          | Fwd                                      | CTACACGACGCTCTTCCGATCTACAGTGGAGTGCAATTG<br>GAGGGACAAGACTTCC    |                                                             |
|                                          |                                          | Rev                                      | GCTGAACCGCTCTTCCGATCTACAGTGGAGTGCAAGGAT<br>CTCAAGCAGGAGAGTA    |                                                             |
| <i>Polq</i> <sup>-/-</sup> (2)           |                                          | Fwd                                      | CTACACGACGCTCTTCCGATCTGCCAATCCTGTGCAATT<br>GGAGGGACAAGACTTCC   |                                                             |
|                                          |                                          | Rev                                      | GCTGAACCGCTCTTCCGATCTACAGTGGAGTGCAAGGAT<br>CTCAAGCAGGAGAGTA    |                                                             |
| <i>Polq</i> <sup>-/-</sup> (3)           |                                          | Fwd                                      | CTACACGACGCTCTTCCGATCTTAGCTTAACACAATAATT<br>GGAGGGACAAGACTTCC  |                                                             |
|                                          |                                          | Rev                                      | GCTGAACCGCTCTTCCGATCTACAGTGGAGTGCAAGGAT<br>CTCAAGCAGGAGAGTA    |                                                             |
| R26C                                     |                                          | <i>Polq</i> <sup>-/-</sup> +<br>POLQ (1) | Fwd                                                            | CTACACGACGCTCTTCCGATCTATCACGCACAAGGCAGA<br>CAACCAAGAAAC     |
|                                          |                                          |                                          | Rev                                                            | GCTGAACCGCTCTTCCGATCTTAGCTTAGACCTCGAAT<br>AGCAGCTTTG        |

|                                    |                                    |                                    |                                                         |                                                         |
|------------------------------------|------------------------------------|------------------------------------|---------------------------------------------------------|---------------------------------------------------------|
|                                    | <i>Polq<sup>-</sup></i> + POLQ (2) | Fwd                                | CTACACGACGCTCTTCCGATCTATCACGCACAAGGCAGA<br>CAACCAAGAAAC |                                                         |
|                                    |                                    | Rev                                | GCTGAACCGCTCTTCCGATCTACAGTGTAGACCTCGAAA<br>TAGCAGCTTTG  |                                                         |
|                                    | <i>Polq<sup>-</sup></i> + POLQ (3) | Fwd                                | CTACACGACGCTCTTCCGATCTATCACGCACAAGGCAGA<br>CAACCAAGAAAC |                                                         |
|                                    |                                    | Rev                                | GCTGAACCGCTCTTCCGATCTGCCAATGCAGACCTCGAA<br>ATAGCAGCTTTG |                                                         |
|                                    | <i>Polq<sup>-</sup></i> (1)        | Fwd                                | CTACACGACGCTCTTCCGATCTCTTGTAAACAAGGCAG<br>ACAACCAAGAAAC |                                                         |
|                                    |                                    | Rev                                | GCTGAACCGCTCTTCCGATCTTAGCTTAGACCTCGAAAT<br>AGCAGCTTTG   |                                                         |
|                                    | <i>Polq<sup>-</sup></i> (2)        | Fwd                                | CTACACGACGCTCTTCCGATCTCTTGTAAACAAGGCAG<br>ACAACCAAGAAAC |                                                         |
|                                    |                                    | Rev                                | GCTGAACCGCTCTTCCGATCTACAGTGTAGACCTCGAAA<br>TAGCAGCTTTG  |                                                         |
|                                    | <i>Polq<sup>-</sup></i> (3)        | Fwd                                | CTACACGACGCTCTTCCGATCTCTTGTAAACAAGGCAG<br>ACAACCAAGAAAC |                                                         |
|                                    |                                    | Rev                                | GCTGAACCGCTCTTCCGATCTGCCAATGCAGACCTCGAA<br>ATAGCAGCTTTG |                                                         |
|                                    | R26D                               | <i>Polq<sup>-</sup></i> + POLQ (1) | Fwd                                                     | CTACACGACGCTCTTCCGATCTACAGTGACCTGGCATGG<br>TATTGCTTATC  |
|                                    |                                    |                                    | Rev                                                     | GCTGAACCGCTCTTCCGATCTTTAGGCAGTCACCAGGTT<br>TGACTTGGTTCA |
| <i>Polq<sup>-</sup></i> + POLQ (2) |                                    | Fwd                                | CTACACGACGCTCTTCCGATCTGCCAATGACCTGGCATG<br>GTATTGCTTATC |                                                         |
|                                    |                                    | Rev                                | GCTGAACCGCTCTTCCGATCTTTAGGCAGTCACCAGGTT<br>TGACTTGGTTCA |                                                         |
| <i>Polq<sup>-</sup></i> + POLQ (3) |                                    | Fwd                                | CTACACGACGCTCTTCCGATCTGCCAATGACCTGGCATG<br>GTATTGCTTATC |                                                         |
|                                    |                                    | Rev                                | GCTGAACCGCTCTTCCGATCTCGATGTGCACCAGGTTTG<br>TACTTGGTTCA  |                                                         |
| <i>Polq<sup>-</sup></i> (1)        |                                    | Fwd                                | CTACACGACGCTCTTCCGATCTACAGTGACCTGGCATGG<br>TATTGCTTATC  |                                                         |
|                                    |                                    | Rev                                | GCTGAACCGCTCTTCCGATCTGGCTACCTCACCAGGTTT<br>GTACTTGGTTCA |                                                         |
| <i>Polq<sup>-</sup></i> (2)        |                                    | Fwd                                | CTACACGACGCTCTTCCGATCTGCCAATGACCTGGCATG<br>GTATTGCTTATC |                                                         |
|                                    |                                    | Rev                                | GCTGAACCGCTCTTCCGATCTGGCTACCTCACCAGGTTT<br>GTACTTGGTTCA |                                                         |
| <i>Polq<sup>-</sup></i> (3)        |                                    | Fwd                                | CTACACGACGCTCTTCCGATCTACAGTGACCTGGCATGG<br>TATTGCTTATC  |                                                         |
|                                    |                                    | Rev                                | GCTGAACCGCTCTTCCGATCTCGATGTGCACCAGGTTTG<br>TACTTGGTTCA  |                                                         |
| R26E                               |                                    | <i>Polq<sup>-</sup></i> + POLQ (1) | Fwd                                                     | CTACACGACGCTCTTCCGATCTCAGATCTTGGCTTATCC<br>AACCCCTAGA   |
|                                    |                                    |                                    | Rev                                                     | GCTGAACCGCTCTTCCGATCTCTTGATGTGGAACACCA<br>CCTGACG       |
|                                    | <i>Polq<sup>-</sup></i> + POLQ (2) | Fwd                                | CTACACGACGCTCTTCCGATCTCAGATCTTGGCTTATCC<br>AACCCCTAGA   |                                                         |
|                                    |                                    | Rev                                | GCTGAACCGCTCTTCCGATCTACTTGACTGTGGAACACC<br>ACCTGACG     |                                                         |
|                                    | <i>Polq<sup>-</sup></i> + POLQ (3) | Fwd                                | CTACACGACGCTCTTCCGATCTCAGATCTTGGCTTATCC<br>AACCCCTAGA   |                                                         |

|                      |                             |     |                                                                   |
|----------------------|-----------------------------|-----|-------------------------------------------------------------------|
|                      |                             | Rev | GCTGAACCGCTCTTCCGATCTCAGATCGATGTGGAACAC<br>CACCTGACG              |
|                      | <i>Polq<sup>-</sup></i> (1) | Fwd | CTACACGACGCTCTTCCGATCTTGACCACATGGCTTATC<br>CAACCCCTAGA            |
|                      |                             | Rev | GCTGAACCGCTCTTCCGATCTCTTGATGTGGAACACCA<br>CCTGACG                 |
|                      | <i>Polq<sup>-</sup></i> (2) | Fwd | CTACACGACGCTCTTCCGATCTTGACCACATGGCTTATC<br>CAACCCCTAGA            |
|                      |                             | Rev | GCTGAACCGCTCTTCCGATCTACTTGACTGTGGAACACC<br>ACCTGACG               |
|                      | <i>Polq<sup>-</sup></i> (3) | Fwd | CTACACGACGCTCTTCCGATCTTGACCACATGGCTTATC<br>CAACCCCTAGA            |
|                      |                             | Rev | GCTGAACCGCTCTTCCGATCTCAGATCGATGTGGAACAC<br>CACCTGACG              |
| Substrate            | 3bp-AT                      | Fwd | CTACACGACGCTCTTCCGATCTCAGATCATCGACAGATC<br>TAAGCGATGCTCTCACCGAG   |
|                      |                             | Rev | GCTGAACCGCTCTTCCGATCTCAGATCGTACCTTGACCA<br>GATGGGTGTGAGAGTGAAGATC |
|                      | 3bp-GC                      | Fwd | CTACACGACGCTCTTCCGATCTCAGATCATCGACAGATC<br>TAAGCGATGCTCTCACCGAG   |
|                      |                             | Rev | GCTGAACCGCTCTTCCGATCTCAGATCTCGAGACGATGT<br>GATGGGTGTGAGAGTGAAGATC |
|                      | 6bp-AT                      | Fwd | CTACACGACGCTCTTCCGATCTCAGATCGTACCTTGACC<br>ATAAGCGATGCTCTCACCGAG  |
|                      |                             | Rev | GCTGAACCGCTCTTCCGATCTCAGATCATCGACAGATCG<br>ATGGGTGTGAGAGTGAAGATC  |
| Secondary<br>NGS PCR | All                         | Fwd | AATGATACGGCGACCACCGAGATCTACACTCTTCCCTA<br>CACGACGCTCTTCCGATCT     |
|                      |                             | Rev | CAAGCAGAAGACGGCATACGAGATCGGTCTCGGCATTC<br>CTGCTGAACCGCTCTTCCGATCT |

Forward and reverse primers used for high throughput sequencing library preparation.

**Table S6.** Sequencing reads

| Genotype                               | Break site | Replicate 1 | Replicate 2 | Replicate 3 |
|----------------------------------------|------------|-------------|-------------|-------------|
| <i>Polq</i> <sup>-</sup> + <i>POLQ</i> | R26A       | 31617       | 26815       | 19817       |
|                                        | R26B       | 64880       | 9713        | 140496      |
|                                        | R26C       | 135961      | 116342      | 140111      |
|                                        | R26D       | 172163      | 173076      | 175362      |
|                                        | R26E       | 185531      | 207476      | 247170      |
| <i>Polq</i> <sup>-</sup>               | R26A       | 25726       | 18706       | 18636       |
|                                        | R26B       | 21176       | 141187      | 153290      |
|                                        | R26C       | 146179      | 148533      | 164259      |
|                                        | R26D       | 146713      | 138013      | 151899      |
|                                        | R26E       | 144012      | 132219      | 93086       |

Number of reads analyzed from each biological replicate for the two genotypes in the five loci tested.

## SI references

1. K. Janetzko, *et al.*, A single-tube real-time PCR assay for mycoplasma detection as a routine quality control of cell therapeutics. *Transfus. Med. Hemotherapy* **41**, 83–89 (2014).
2. M. Battaglia, D. Pozzi, S. Crimaldi, T. Parasassi, Hoechst 33258 staining for detecting mycoplasma contamination in cell cultures: A method for reducing fluorescence photobleaching. *Biotech. Histochem.* **69**, 152–156 (1994).
3. W. X. Wen, C. O. Leong, Association of BRCA1- And BRCA2-deficiency with mutation burden, expression of PD-L1/ PD-1, immune infiltrates, and T cell-inflamed signature in breast cancer. *PLoS One* **14** (2019).
4. S. Nik-Zainal, *et al.*, Landscape of somatic mutations in 560 breast cancer whole-genome sequences. *Nature* **534**, 47–54 (2016).
5. W. Feng, *et al.*, Genetic determinants of cellular addiction to DNA polymerase theta. *Nat. Commun.* **10** (2019).
